# Supplementary material for: Yeast Trk1 Potassium Transporter Gradually Changes Its Affinity in Response to Both External and Internal Signals
Source: MDPI journal article supplement (doi:10.3390/jof8050432), 2022-04-22
Supplement: s1 [file s1]

**Yeast Trk1 potassium transporter gradually changes its affinity in response to both external and internal signals**

**Jakub Masaryk, Hana Sychrová\***

Laboratory of Membrane Transport, Institute of Physiology, Czech Academy of Sciences,  
Prague, Czech Republic

**Supplementary material**

**Table S1. List of yeast strains**

| <b>Name</b>   | <b>Genotype</b>                                      | <b>Reference</b> |
|---------------|------------------------------------------------------|------------------|
| <b>BY4741</b> | <i>MATa his3Δ1 leu2Δ0 met15Δ0 ura3Δ0</i>             | EUROSCARF        |
| <b>BYT2</b>   | <i>trk2Δ::loxP</i> , derived from BY4741             | [25]             |
| <b>BYT12</b>  | <i>trk1Δ::loxP trk2Δ::loxP</i> , derived from BY4741 | [48]             |

[25] Petrezselyova, S.; Ramos, J.; Sychrova, H. Trk2 transporter is a relevant player in K<sup>+</sup> supply and plasma-membrane potential control in *Saccharomyces cerevisiae*. *Folia Microbiol.* **2011**, *56*, 23-28.

[48] Petrezselyova, S.; Zahradka, J.; Sychrova, H. *Saccharomyces cerevisiae* BY4741 and W303-1A laboratory strains differ in salt tolerance. *Fungal Biol.* **2010**, *114*, 144-150.

**Table S2. List of plasmids**

| Plasmid                                                                                   | Relevant features                                        | Reference                |
|-------------------------------------------------------------------------------------------|----------------------------------------------------------|--------------------------|
| <i>Empty multicopy plasmids</i>                                                           |                                                          |                          |
| pRS316                                                                                    | <i>URA3</i> , CEN6ARS4                                   | [49]                     |
| YEpl352                                                                                   | <i>URA3</i> , 2 $\mu$ origin                             | [50]                     |
| <i>Empty centromeric plasmid</i>                                                          |                                                          |                          |
| YCp352                                                                                    | YEpl352-CEN6ARS4<br><i>URA3</i> ,                        | This study               |
| <i>Multicopy plasmids with TRK1*</i>                                                      |                                                          |                          |
| pScTRK1                                                                                   | <i>ScTRK1</i> in YEpl352                                 | Papouskova (unpublished) |
| pGRU1ScTRK1                                                                               | GFP-tagged <i>ScTRK1</i><br><i>URA3</i> , 2 $\mu$ origin | [24]                     |
| <i>Centromeric plasmids with TRK1*</i>                                                    |                                                          |                          |
| pCScTRK1                                                                                  | pScTRK1-CEN6ARS4                                         | This study               |
| pCScTRK1-GFP                                                                              | pGRU1ScTRK1-CEN6ARS4                                     | This study               |
| <i>Centromeric plasmids pCScTRK1 and pCSTRK1-GFP bearing indicated mutations in TRK1*</i> |                                                          |                          |
| pCScTRK1_L949P                                                                            |                                                          | This study               |
| pCScTRK1_L949A                                                                            |                                                          | This study               |
| pCScTRK1_L949E                                                                            |                                                          | This study               |
| pCScTRK1_L949R                                                                            |                                                          | This study               |
| pCScTRK1_L949S                                                                            |                                                          | This study               |
| pCScTRK1_L81P                                                                             |                                                          | This study               |
| pCScTRK1_F820P                                                                            |                                                          | This study               |
| pCScTRK1_L1115P                                                                           |                                                          | This study               |
| pCScTRK1-GFP_L949P                                                                        |                                                          | This study               |
| pCScTRK1-GFP_L949A                                                                        |                                                          | This study               |
| pCScTRK1-GFP_L949E                                                                        |                                                          | This study               |
| pCScTRK1-GFP_L949R                                                                        |                                                          | This study               |
| pCScTRK1-GFP_L81P                                                                         |                                                          | This study               |
| pCScTRK1-GFP_F820P                                                                        |                                                          | This study               |
| pCScTRK1-GFP_L1115P                                                                       |                                                          | This study               |

\**TRK1* expressed under the control of weak and constitutive *S. cerevisiae* *NHA1* promoter

- [49] Sikorski, R.; Hieter, P. A system of shuttle vectors and yeast host strains designed for efficient manipulation of DNA in *Saccharomyces cerevisiae*. *Genetics* **1989**, *122*, 19-27.
- [50] Hill, J.; Myers, A.; Koerner, T.; Tzagoloff, A. Yeast/*E. coli* shuttle vectors with multiple unique restriction sites. *Yeast* **1986**, *2*, 163-167.
- [24] Zimmermannova, O.; Felcmanova, K.; Rosas-Santiago, P.; Papouskova, K.; Pantoja, O.; Sychrova, H., Erv14 cargo receptor participates in regulation of plasma-membrane potential, intracellular pH and potassium homeostasis via its interaction with K<sup>+</sup>-specific transporters Trk1 and Tok1. *Biochim. Biophys. Acta* **2019**, *1866*, 1376-1388.

**Table S3. List of used oligonucleotides**

| Oligonucleotide                  | Sequence (5'-3')                                            |
|----------------------------------|-------------------------------------------------------------|
| <b>2μ-CEN6ARS4 exchange</b>      |                                                             |
| 2μ-CEN6ARS4_for                  | cggcatcagagcagattgtactgagagtgaccataacgcGGGTCCTTTTCATCACGTGC |
| 2μ-CEN6ARS4_rev                  | tgctccttccttgcttcttctgttcggagattaccgCTTAGGACGGATCGCTTGCC    |
| URA3_for                         | GTATATTCTCCAGTAGATAGG                                       |
| CEN6ARS4_rev                     | GTAAGTTACAGGCAAGCGATCCG                                     |
| <b>Site-directed mutagenesis</b> |                                                             |
| ScTRK1_L949P_for                 | GCTATAGAGTCCTTGTCGGC <u>CCG</u> TTTCAATCTGTTAGCACAAG        |
| ScTRK1_L949P_rev                 | CTTGTGCTAACAGATTGAAAC <u>CGG</u> GCCGACAAGGACTCTATAGC       |
| ScTRK1_L949A_for                 | GCTATAGAGTCCTTGTCGGC <u>GCG</u> TTTCAATCTGTTAGCACAAG        |
| ScTRK1_L949A_rev                 | CTTGTGCTAACAGATTGAAAC <u>GCG</u> GCCGACAAGGACTCTATAGC       |
| ScTRK1_L949E_for                 | GCTATAGAGTCCTTGTCGGC <u>GAG</u> TTTCAATCTGTTAGCACAAG        |
| ScTRK1_L949E_rev                 | CTTGTGCTAACAGATTGAAAC <u>CTC</u> GCCGACAAGGACTCTATAGC       |
| ScTRK1_L949R_for                 | GCTATAGAGTCCTTGTCGGC <u>CGG</u> TTTCAATCTGTTAGCACAAG        |
| ScTRK1_L949R_rev                 | CTTGTGCTAACAGATTGAAAC <u>CCG</u> GCCGACAAGGACTCTATAGC       |
| ScTRK1_L949S_for                 | GCTATAGAGTCCTTGTCGGC <u>TCG</u> TTTCAATCTGTTAGCACAAG        |
| ScTRK1_L949S_rev                 | CTTGTGCTAACAGATTGAAAC <u>CGA</u> GCCGACAAGGACTCTATAGC       |
| ScTRK1_L81P_for                  | GATACATTGATACAC <u>CCG</u> TTTTTAGCAGCGGG                   |
| ScTRK1_L81P_rev                  | CCCCTGCTAAAAAC <u>CGG</u> TGTATCAATGTATC                    |
| ScTRK1_F820P_for                 | CTACATGGTGGGGAC <u>CT</u> TGGACAGCAATGAG                    |
| ScTRK1_F820P_rev                 | CTCATTGCTGTCCA <u>AGG</u> TCCCCACCATGTAG                    |
| ScTRK1_L1115P_for                | CAAACTTTAATATATTTGCAATT <u>CCT</u> TTTGAAATTGTTAGCGCTTACGG  |
| ScTRK1_L1115P_rev                | CCGTAAGCGCTAACAATTTCAAA <u>AGGA</u> ATTGCAAATATATTAAAGTTTG  |

\*underlined: codon for substituting amino acid

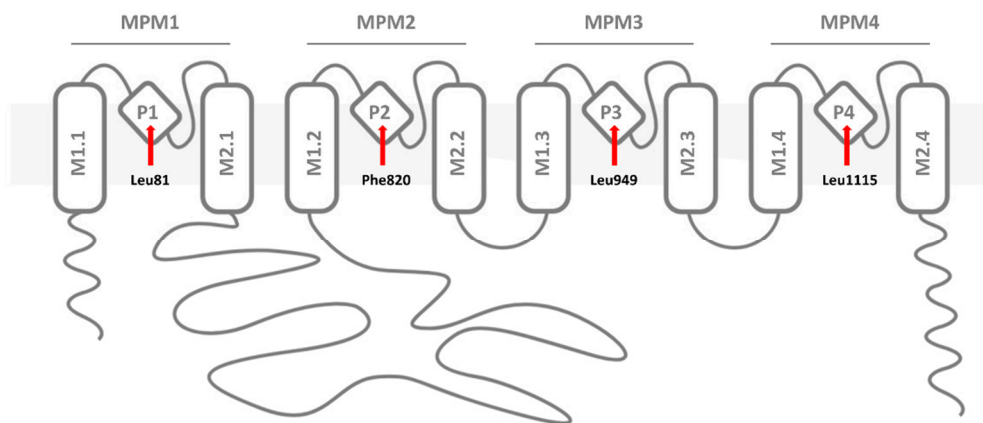

**Figure S1: Schematic representation of the predicted transmembrane topology of *ScTRK1*. Highlighted are positions of residues studied in this work.**

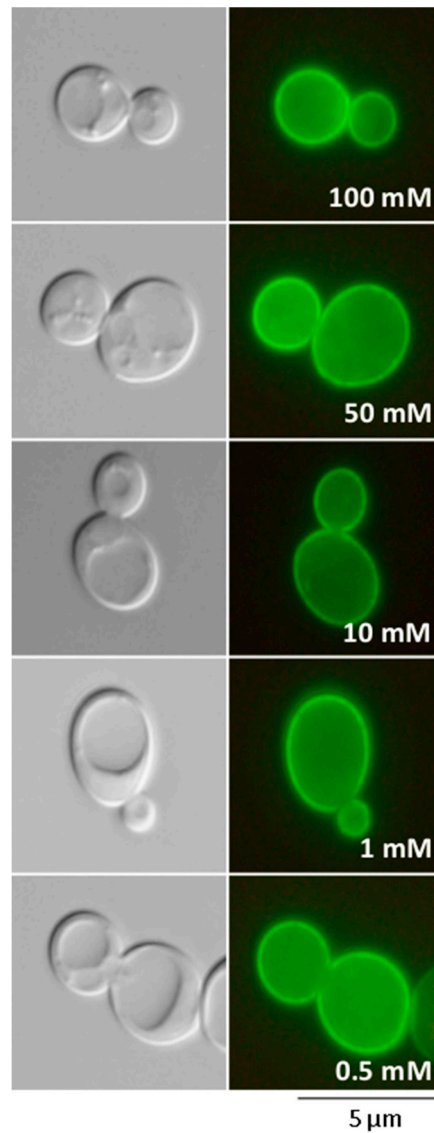

**Figure S1. Localization of GFP-tagged Trk1.** Cells were grown in YNB-F supplemented with indicated KCl concentrations to  $OD_{600} \sim 1$ , and visualized using Olympus Bx53 microscope and captured by Olympus DP73 camera.
